# Supplementary material for: Thyroid-related Hormone Levels in Clinical Patients with Moderately Severe-to-Profound Sudden Sensorineural Hearing Loss: A Prospective Study
Source: Research Square preprint supplement (doi:10.21203/rs.3.rs-467680/v1), 2021-05-04
Supplement: Supplementary file 1 [file cf0dfb33f6c86b701fb72404.docx]

**Thyroid-related hormone levels versus the severity of hearing loss**

We performed a linear correlation analysis and drew the scatterplots of thyroid-related hormone levels versus severity of hearing loss (Fig 3), and found no association between moderately severe-to-profound SSNHL and TSH when hearing loss was treated as a continuous variable.


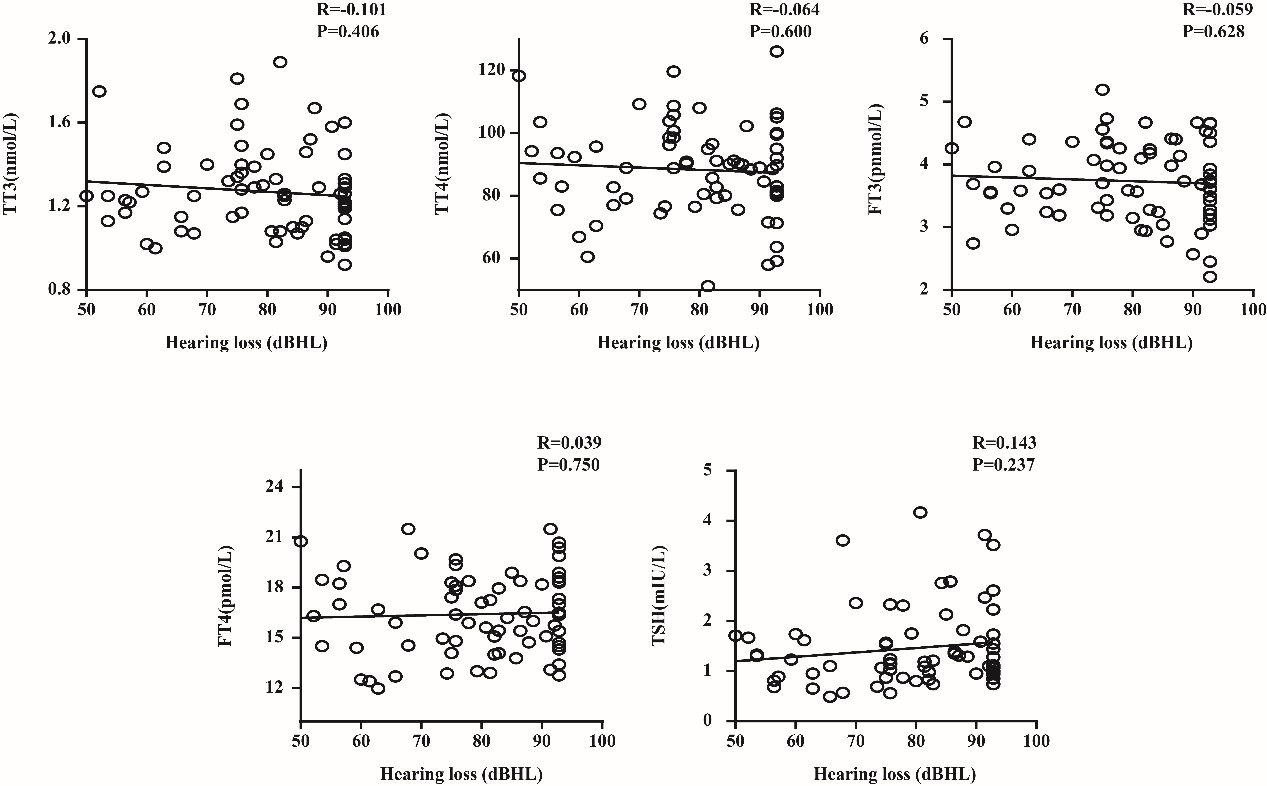
Fig 3. Plots of thyroid-related hormone levels versus the severity of hearing loss

TT3, total triiodothyronine; TT4, total thyroxine; FT3, free triiodothyronine; FT4, free thyroxine; TSH, thyroid stimulating hormone; R, correlation coefficient

Data are presented as correlation coefficients and P values.
